1 **Similarities in the behaviour of dance followers among honey bee**  
2 **species suggest a conserved mechanism of dance communication**

3 Ebi Antony George<sup>1\*</sup>, Smruti Pimplikar<sup>1</sup>, Neethu Thulasi<sup>1</sup>, Axel Brockmann<sup>1</sup>

4 1 National Centre for Biological Sciences, Bangalore, India – 560065

5

6

7 ORCID

8 E.A.G.: 0000-0002-5533-5428

9 S.P.: 0000-0002-6683-5946

10 N.T.: 0000-0003-4702-8900

11 A.B.: 0000-0003-0201-9656

12

13 \* corresponding author:

14 Ebi Antony George

15 Email ID: [ebiantonyg@ncbs.res.in](mailto:ebiantonyg@ncbs.res.in), [ebi.antony.george@gmail.com](mailto:ebi.antony.george@gmail.com)

## 16 **Abstract**

17 Group living organisms rely on intra-group communication to adjust individual and collective  
18 behavioural decisions. Complex communication systems are predominantly multimodal and  
19 combine modulatory and information bearing signals. The honey bee waggle dance, one of  
20 the most elaborate forms of communication in invertebrates, stimulates nestmates to search  
21 for food and communicates symbolic information about the location of the food source.  
22 Previous studies on the dance behaviour in diverse honey bee species demonstrated distinct  
23 differences in the combination of visual, auditory, olfactory, and tactile signals produced by  
24 the dancer. We now studied the behaviour of the receivers of the dance signals, the dance  
25 followers, to explore the significance of the different signals in the communication process.  
26 In particular, we ask whether there are differences in the behaviour of dance followers  
27 between the 3 major Asian honey bee species, *A. florea*, *A. dorsata* and *A. cerana*, and  
28 whether these might correlate with the differences in the signals produced by the dancing  
29 foragers. Our comparison demonstrates that the behaviour of the dance followers is highly  
30 conserved across all 3 species despite the differences in the dance signals. The highest  
31 number of followers was present lateral to the dancer throughout the waggle run, and the  
32 mean body orientation of the dance followers with respect to the waggle dancer was close to  
33 90° throughout the run for all 3 species. These findings suggest that dance communication  
34 might be more conserved than implied by the differences in the signals produced by the  
35 dancer. Along with studies in *A. mellifera*, our results indicate that all honey bee species rely  
36 on tactile contacts between the dancer and follower to communicate spatial information. The  
37 cues and signals that differ between the species may be involved in attracting the followers  
38 towards the dancer in the different nest environments.

39

## 40 **Keywords**

41 *Apis florea*, *Apis cerana*, *Apis dorsata*, waggle dance evolution, spatial information transfer,  
42 tactile hypothesis

## 43 **Introduction**

44 Organisms have evolved various ways to communicate amongst themselves [1].  
45 Communication involves indirect cues and direct signals and varies in its complexity [2,3].  
46 Complexity in communication systems correlates with social group complexity [4, but see 5].  
47 Social communication mechanisms consist of multiple signal channels which can be of the  
48 same modality, e.g. ant pheromone trails, or different modalities, as in the case of ritualised  
49 courtship signals in birds [6,7]. In these communication systems, the different signals are  
50 either equally informative, or one of the signals contains the information and the others act as  
51 modulators, enhancing the effect or spread of the signal [8]. Finally, environmental factors  
52 and plasticity in the signal can lead to divergence in signals across closely related species [9–  
53 11].

54 One of the most elaborate types of social communication in invertebrates is the honey bee  
55 waggle dance used by foragers returning from profitable food sources to recruit nestmates  
56 [12]. The waggle dance motivates foragers to fly out and in addition encodes spatial  
57 information about the food source [13,14]. Each waggle dance consists of multiple circuits  
58 and one circuit contains two phases; a straight walking phase in which the dancer waggles its  
59 abdomen back and forth (the waggle run or the waggle phase) and a circular walking phase  
60 which brings the dancer back towards the point of origin of the first phase (the return phase).  
61 The duration of the waggle run corresponds to the distance to the food source [12,14]. In *Apis*  
62 *mellifera*, in which foragers dance in the dark on vertical combs, the body orientation of the  
63 dancer with respect to the vertical (gravity) axis during the waggle run corresponds to the  
64 direction of the food source from the hive with respect to the sun's azimuth [12]. Further, the  
65 duration of the return phase corresponds to the reward value of the food source as perceived  
66 by the forager [15]. For food sources very close to the hive, the dance circuit becomes nearly  
67 circular with a very short waggle run [16].

68 Cues and signals from the environment and nestmates can modulate the probability and  
69 intensity of dance behaviour [15,17–19]. Interactions with nestmates in the hive inform nectar  
70 foragers about the colony food stores and the nectar influx into the colony [18,20,21]. In  
71 addition, interactions with other foragers provide information about predation and  
72 overcrowding at the food source [22,23]. An individual forager's dance activity is modulated  
73 by the perceived reward value of the food source along with information from these  
74 interactions [19]. This in turn drives recruitment to each food source proportional to its

75 relative reward value, which leads to an efficient distribution of the colony's foraging force  
76 [24]. Thus, the waggle dance acts as the primary regulatory mechanism of the colony's  
77 recruitment activity in addition to its role in the efficient spatial distribution of the colony's  
78 foragers.

79 Although extensive research has been done on the honey bee waggle dance behaviour, the  
80 mechanism underlying the transfer of spatial information has remained elusive [25,26]. The  
81 experimental difficulty lies in determining which of the multiple dances followed is used to  
82 obtain information [24] and in tracking whether the follower visited the indicated food  
83 source. Moreover, recent studies showed that followers can choose to rely on either the  
84 information from the dancer or their own memory [27,28]. Currently, there are two major  
85 hypotheses on which signals dance followers use to obtain spatial information from the  
86 dancer. The "tactile hypothesis" proposes that dance followers use tactile signals, associated  
87 with physical contact between the dancer and follower [29,30] or even mechanosensory  
88 signals, associated with the air flow caused by a dancer's vibrating wings [31,32]. The  
89 "follow hypothesis" suggests that followers obtain information from dancers by following the  
90 path of the dancer from behind [33]. In this case, followers receive the dance information  
91 from their own body positions and walking paths to calculate the direction and distance of the  
92 food source being advertised. Studies on the mechanism of spatial information transfer in *A.*  
93 *mellifera* offered preliminary evidence for both hypotheses [29,33]. Instead, comparative  
94 studies on dance communication including the behaviour of the dance followers in different  
95 honey bee species might help to decide the controversy [34].

96 Interestingly, there are characteristic differences between the species in the combination of  
97 signals generated by the dancer [34–39]. Dances of the dwarf honey bees (e.g. *A. florea*),  
98 which take place on a horizontal surface exposed to the sun, include a conspicuous visual  
99 signal (raised abdomens) but no auditory signals [40]. The giant honey bees (e.g. *A. laboriosa*  
100 and *A. dorsata*) usually dance on the vertical surface of the bee curtain exposed to the sun  
101 [38]. Dances of the diurnal *A. laboriosa* are silent [41], whereas those of the cathemeral *A.*  
102 *dorsata* contain auditory signals [42]. All cavity nesting species investigated (e.g. *A.*  
103 *mellifera*, *A. cerana* and *A. nigrocincta*), which perform dances in the hive, produce auditory  
104 signals [38]. However, it is unclear whether these differences in dance signals imply the  
105 evolution of different mechanisms for information transfer across the genus or whether the  
106 mechanism is the same with the different signals and cues serving to attract followers [43,44].

107 We performed a comparative study to explore the dance follower behaviour of Asian honey  
108 bees and to test if possible differences in dance follower behaviour might correlate with  
109 differences in the signals and cues produced by the dancer. Parallel changes in the behaviour  
110 of the dancer and dance follower would be a strong argument for the evolution of different  
111 mechanisms of information transfer across the genus *Apis*. On the other hand, a high degree  
112 of similarity in the behaviour of the dance follower would suggest that the major mechanism  
113 of information transfer is conserved. Further, we monitored the spatial positions of the  
114 followers to obtain evidence for either of the two proposed hypotheses regarding the  
115 mechanism of information transfer. If followers arrange themselves towards the side of the  
116 dancer, then it is likely that they use tactile cues (“tactile hypothesis”) to obtain information  
117 about the food source [29]. In contrast, if followers orient themselves behind the dancer, they  
118 are more likely using their own body orientation (“follow hypothesis”) to determine the  
119 spatial position of the food source [33].

## 120 **Methods**

### 121 **Experimental Location, Colonies and Distance Training**

122 This study is based on analysis performed on videos of waggle dances *A. florea*, *A. dorsata*  
123 and *A. cerana* that were recorded as part of another study [45].

124 The experiments were performed in the Botanical Garden at the University of Agricultural  
125 Sciences, Gandhi Krishi Vignana Kendra, Bengaluru (latitude: 13.07, longitude: 77.57). The  
126 garden provides dense vegetation cover and hence good optic flow for the foragers (fig S1).  
127 Experiments were done with two *A. florea* and *A. cerana* colonies each and one *A. dorsata*  
128 colony. The first set of colonies from all 3 species was observed in January - March 2017,  
129 and the second *A. cerana* and *A. florea* colony was observed in February - April 2018. For  
130 further details on colony preparation, see Kohl *et al.*, 2020 [45].

131 A brief description of the distance training protocol employed for all three species in Kohl *et*  
132 *al.*, 2020 [45] is provided here. The foragers in all three species were trained along a 500 m  
133 transect using an artificial feeder filled with sucrose solution scented with star anise (*Illicium*  
134 *verum*) extract. The sucrose concentration at the feeder was adjusted between 1 and 2.5 M  
135 depending on the number of foragers visiting our food source. Individual foragers were paint  
136 marked using Uni POSCA Paint markers (Uni Mitsubishi Pencil, UK). The dance activity of  
137 the marked foragers was recorded at 1080p and 50 frames per second for one hour each at

138 100 m, 200 m, 300 m, 400 m and 500 m using a Sony HDR CX260V Handycam (Sony  
139 Corporation, Tokyo). In the case of *A. dorsata*, the dance activity was recorded at distances  
140 of 100 m, 200 m, 300 m and 400 m, but not at 500 m since foragers did not come to the  
141 feeder at this distance.

## 142 **Video Analysis**

143 For the video analysis, individual foragers were first shortlisted based on whether they were  
144 active at the feeder at multiple distances. We then analysed each dance circuit in the dances  
145 by these individuals to determine the duration of the waggle run. The videos were observed  
146 frame-by-frame in Virtual Dub 1.10.4 (<http://www.virtualdub.org>). The first frame in which a  
147 focal bee clearly moved its abdomen laterally or dorsoventrally was defined as the start of the  
148 waggle run in that circuit. The frame in which the bee stopped wagging its abdomen and  
149 started turning to the left or right was defined as the end of the waggle run. The time between  
150 the start and the end frames was calculated as the duration of the waggle run.

## 151 **Follower Behaviour**

152 We defined dance followers as those bees which positioned themselves within one bee length  
153 of the dancer and excluded others who were beyond this distance threshold and not following  
154 the dancer [30]. In each run, we focussed on 3 phases (time-points); the Start, Middle and  
155 End, based on the waggle run duration we had calculated (fig 1 *a*). This was done to look at  
156 whether there was a change in the number of followers as the run progressed [29]. At each  
157 time-point, the number of followers present in the following three zones (fig 1 *b*) around the  
158 dancer was counted; the anterior zone around the head region of the dancer, the lateral zone  
159 near the thorax and abdomen, and the posterior zone behind the abdomen [29].

160 The body angles of the follower with respect to the angle of the dancer were quantified  
161 manually using OnScreenProtractor v0.3 (<http://osprotractor.sourceforge.net>). We first made  
162 a dancer vector, pointing in the abdomen to head direction of the dancer. We then made  
163 follower vector, pointing from the follower's head to its abdomen. Finally, the body angle of  
164 the follower was quantified as the angle subtended by the follower vector with respect to the  
165 dancer vector in the clockwise direction (fig 1 *c*). In total, we calculated 5036 follower  
166 positions and body angles (from 330 waggle runs of 41 waggle dances) in *A. florea*, 1363  
167 (from 119 waggle runs of 7 waggle dances) in *A. dorsata* and 4989 (from 411 waggle runs of  
168 35 waggle dances) in *A. cerana* (table S1). Since followers were not individually identifiable,

169 it is possible that some of the followers we counted were the same across multiple runs and  
170 dances.

## 171 **Figure 1**

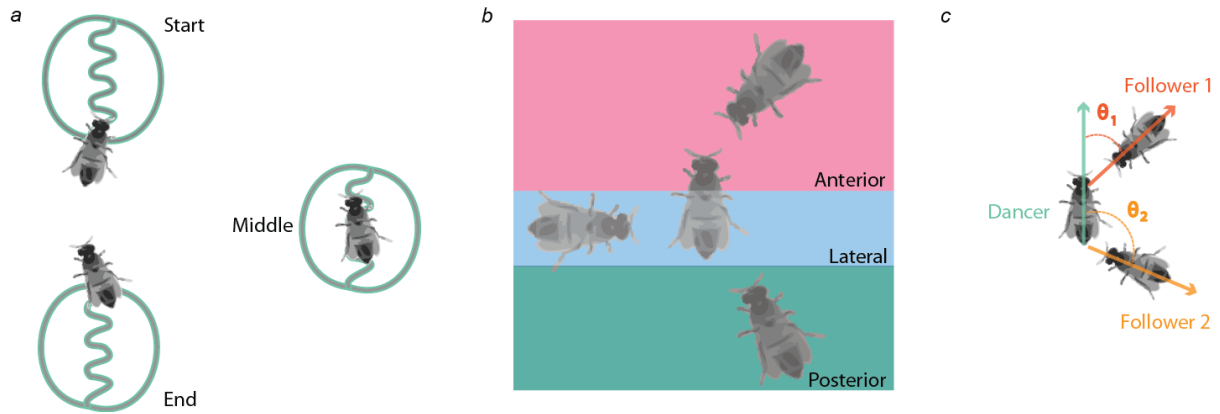

172

173

174 Schematic of the analysis done. (a) Each waggle run was divided into 3 phases: the start,  
175 middle and end. (b) Followers around the dancer were grouped into 3 zones (Anterior, Lateral  
176 and Posterior) based on the position they occupied around the dancer (area of the zones in the  
177 figure are representative). (c) The orientations of the followers with respect to the dancer ( $\theta$ )  
178 were then quantified.

179

## 180 **Statistical Analysis**

### 181 *Number of Followers*

182 The dataset of the number of followers was zero inflated (21.17 % zero values) and hence we  
183 fit zero-inflated Poisson models [46]. Models were built with different combinations of 4  
184 predictors for the conditional part of the model (table S2): i) zone of dance follower (a  
185 categorical variable of 3 levels; Anterior, Lateral and Posterior), ii) phase of waggle run (a  
186 categorical variable of 3 levels; Start, Middle and End), iii) species (a categorical variable of  
187 3 levels; *A. florea*, *A. cerana* and *A. dorsata*) and iv) distance (a continuous variable which  
188 was scaled with a mean of zero and a standard deviation of 1). For the zero-inflated part of  
189 the model, we fit the 3 categorical variables in all models except 5 (due to model  
190 convergence errors, see table S2). We then compared the models based on their AIC values  
191 and shortlisted those within a cut-off of 0.95 cumulative Akaike weights [47]. Further, we  
192 performed multiple comparisons (with Tukey corrections) of the estimated mean number of  
193 followers. We focussed on three comparisons: i) between the 3 species, ii) between the  
194 different zones within each waggle run phase and iii) between the same zones across the

195 waggle run phases. We did these specific comparisons based on the important predictors in  
196 the shortlisted model (table S2 and S3).

### 197 *Orientation of followers*

198 We used circular statistics to analyse the orientation of the dance followers. We first  
199 constrained the body angles of all the dance followers to lie between  $0^\circ$  and  $180^\circ$ , by  
200 converting all the angles greater than  $180^\circ$  to their mirror images in the  $0^\circ$  -  $180^\circ$  range (e.g.,  
201  $210^\circ$  was converted to  $150^\circ$ ,  $270^\circ$  to  $90^\circ$  etc). We based this on the assumption that  
202 occupying either the left or the right side of the dancer provided similar access to information  
203 for the follower. In addition, this prevented us from obtaining biased estimates of the circular  
204 mean and length due to potential bimodality in the circular distributions. After checking for  
205 unimodality using the Rayleigh test for unimodal departures from uniformity [48], and  
206 reflective symmetry [49], we used Fishers Circular Nonparametric test to compare the  
207 median angles of the circular distributions [50,51]. We compared the circular distributions for  
208 each of the 3 pairs of the waggle run phase to determine which were different from each  
209 other.

210 All the models and the plots were made in R [52] using the RStudio IDE [53]. The GLMMs  
211 were fit using the glmmTMB package [54], model selection and averaging were done using  
212 the MuMIn package [55] and the model assumptions were checked using the DHARMA  
213 package [56]. Multiple comparisons were done using the emmeans package [57]. Circular  
214 statistics were done using the circular package [58] and code found in Pewsey et al. 2013.

## 215 **Results**

### 216 **Number of Followers**

217 We found only one model at the 0.95 cut-off level for cumulative sum of Akaike weights  
218 based on our model comparisons (table S3). In this model, the important predictors were the  
219 species and an interaction between the waggle run phase and the zone of the follower, but not  
220 the distance (table S4). In the zero-inflated part of this model, none of the predictors  
221 significantly correlated with the number of absences (i.e., in the number of observations  
222 where there were no followers), and these results are provided in the supplementary  
223 information (table S4).



224 **Figure 2**

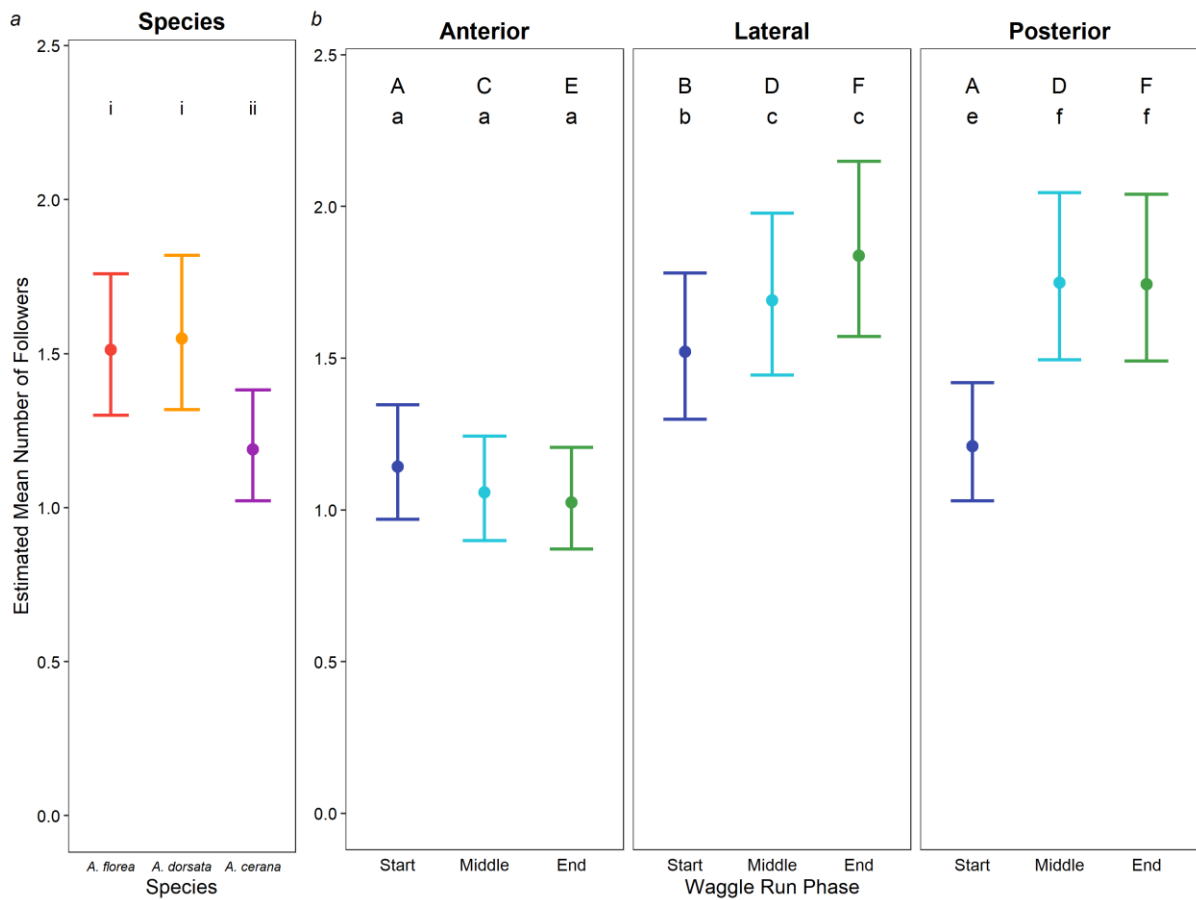

225

226 (a) The estimated mean number of followers present in the waggle dance of the 3 different  
 227 species (*A. florea* – red, *A. dorsata* – orange, *A. cerana* – purple; error bars represent 95%  
 228 confidence intervals). Different roman numerals above the estimates represent significant  
 229 differences at the  $p < 0.05$  level. (b) The estimated mean number of followers present in the  
 230 different zones around the dancer and the different phases of the waggle run (colours based  
 231 on the waggle run phase: Start – blue, Middle – cyan, End – green; error bars represent 95%  
 232 confidence intervals). The alphabets above each circle represents results from the multiple  
 233 comparisons done (estimates with different alphabets were significantly different from each  
 234 other at the  $p < 0.05$  level). Upper case alphabets represent differences in the number of  
 235 followers present in the same waggle run phase across zones. Lower case alphabets represent  
 236 differences in the number of followers present in the same zone across different waggle run  
 237 phases.

238

239 *Effect of species*

240 The species had an effect on the number of followers in the conditional model, but there was  
 241 no interaction between species and any of the other predictors (table S4 and fig 2 a and S2).

242 There were fewer followers per run in *A. cerana* as compared to both *A. florea* and *A. dorsata*  
 243 (estimated mean – *A. cerana*: 1.188; *A. florea*: 1.512; *A. dorsata*: 1.549; t ratio – *A. cerana* vs  
 244 *A. florea*: 10.705,  $p < 0.001$ ; *A. cerana* vs *A. dorsata*: 7.082,  $p < 0.001$ ). The number of

245 followers in *A. florea* and *A. dorsata* were not significantly different (*A. florea* vs *A. dorsata*:  
 246  $t$  ratio = -0.621,  $p$  = 0.809).

247 *Effect of waggle run phase and zone of the followers*

248 The waggle run phase and the zone around the dancer had an interactive effect on the number  
 249 of followers in the conditional model and hence their main effects are not considered (table  
 250 S4 and fig 2 *b* and S2). Within each waggle run phase, there were differences in the number  
 251 of followers in the different zones (table 1). At the Start of the waggle run, the number of  
 252 followers in the Anterior and Posterior zone were similar and significantly lesser than the  
 253 number of followers in the Lateral zone. In the Middle and at the End of the waggle run, the  
 254 number of followers in the Lateral and Posterior zone were similar and significantly higher  
 255 than the number of followers in the Anterior zone.

256 There were differences between each zone in the number of followers across the waggle run  
 257 phase (table 1). In the Anterior zone, the number of followers were similar across all 3 phases  
 258 of the waggle run. In the Lateral zone, the number of followers increased as the waggle run  
 259 progressed, although the number of followers was not significantly different in the Middle  
 260 and the End of the waggle run ( $p$  = 0.051). In the Posterior zone, the number of followers  
 261 increased from the Start to the Middle of the run but did not increase further from the Middle  
 262 to the End of the run.

263 **Table 1**

| Predictor        | Level    | Comparison                   | Estimated Mean        | t ratio        | p value           |
|------------------|----------|------------------------------|-----------------------|----------------|-------------------|
| Waggle Run Phase | Start    | <i>Anterior vs Lateral</i>   | <i>1.142 vs 1.521</i> | -6.360         | < 0.001           |
|                  |          | Anterior vs Posterior        | 1.142 vs 1.209        | -1.213         | 0.446             |
|                  |          | <i>Lateral vs Posterior</i>  | <i>1.521 vs 1.209</i> | <i>5.578</i>   | <i>&lt; 0.001</i> |
|                  | Middle   | <i>Anterior vs Lateral</i>   | <i>1.057 vs 1.690</i> | <i>-11.226</i> | <i>&lt; 0.001</i> |
|                  |          | <i>Anterior vs Posterior</i> | <i>1.057 vs 1.748</i> | <i>-12.110</i> | <i>&lt; 0.001</i> |
|                  |          | Lateral vs Posterior         | 1.690 vs 1.748        | -0.927         | 0.623             |
|                  | End      | <i>Anterior vs Lateral</i>   | <i>1.025 vs 1.838</i> | <i>-14.046</i> | <i>&lt; 0.001</i> |
|                  |          | <i>Anterior vs Posterior</i> | <i>1.025 vs 1.743</i> | <i>-12.656</i> | <i>&lt; 0.001</i> |
|                  |          | Lateral vs Posterior         | 1.838 vs 1.743        | 1.478          | 0.301             |
| Zone of Follower | Anterior | Start vs Middle              | 1.142 vs 1.057        | 1.597          | 0.247             |
|                  |          | Start vs End                 | 1.142 vs 1.025        | 2.212          | 0.069             |
|                  |          | Middle vs End                | 1.057 vs 1.025        | 0.654          | 0.790             |

|  |           |                        |                       |               |                   |
|--|-----------|------------------------|-----------------------|---------------|-------------------|
|  | Lateral   | <i>Start vs Middle</i> | <i>1.521 vs 1.690</i> | <i>-2.802</i> | <i>&lt; 0.001</i> |
|  |           | <i>Start vs End</i>    | <i>1.521 vs 1.838</i> | <i>-5.125</i> | <i>&lt; 0.001</i> |
|  |           | Middle vs End          | 1.690 vs 1.838        | -2.333        | 0.051             |
|  | Posterior | <i>Start vs Middle</i> | <i>1.209 vs 1.748</i> | <i>-9.24</i>  | <i>&lt; 0.001</i> |
|  |           | <i>Start vs End</i>    | <i>1.209 vs 1.743</i> | <i>-9.169</i> | <i>&lt; 0.001</i> |
|  |           | Middle vs End          | 1.748 vs 1.743        | 0.072         | 0.997             |

264 Results of the multiple comparisons of the mean number of dance followers in the different  
265 zones in each waggle run phase and across waggle run phase in the same zone. The means  
266 estimated from the model fitting, as well as the t-ratio and associated  $p$  value are provided,  
267 with comparisons highlighted in italics showing significant differences at the  $p < 0.05$  level.

268

### 269 *Effect of distance*

270 Distance had no effect on the number of followers (fig S3). Distance was not a predictor that  
271 was present in the short-listed models (table S4). Thus, the main effects of the waggle run  
272 phase and the interactive effects of zone and species were similar across all distances.

### 273 **Orientation of followers**

274 Even though all the median orientations were close to  $90^\circ$  (see table S5 for full circular  
275 summary statistics), the species differed in the change of the median circular orientation of  
276 the dance followers from the start to the end of the waggle run (fig 3 and S4). In *A. florea*, the  
277 medians of the 3 circular distributions (associated with the Start, Middle and End of the  
278 waggle run) were significantly different from each other (median – Start: 86.69; Middle:  
279 108.43; End: 100.33; Fisher test statistic – Start vs Middle: 58.898,  $p < 0.001$ ; Start vs End:  
280 25.878,  $p < 0.001$ ; Middle vs End: 10.109,  $p = 0.001$ ). In *A. dorsata*, the medians of the 3  
281 circular distributions did not significantly differ from each other (median – Start: 86.36;  
282 Middle: 91.92; End: 90.66; Fisher test statistic – Start vs Middle: 0.404,  $p = 0.525$ ; Start vs  
283 End: 0.194,  $p = 0.659$ ; Middle vs End: 0.017,  $p = 0.896$ ). Finally, in *A. cerana*, the medians  
284 of the 3 circular distributions were significantly different from each other (median – Start:  
285 79.55; Middle: 94.07; End: 104.4; Fisher test statistic – Start vs Middle: 24.725,  $p < 0.001$ ;  
286 Start vs End: 61.418,  $p < 0.001$ ; Middle vs End: 17.150,  $p = 0.001$ ).

287 **Figure 3**

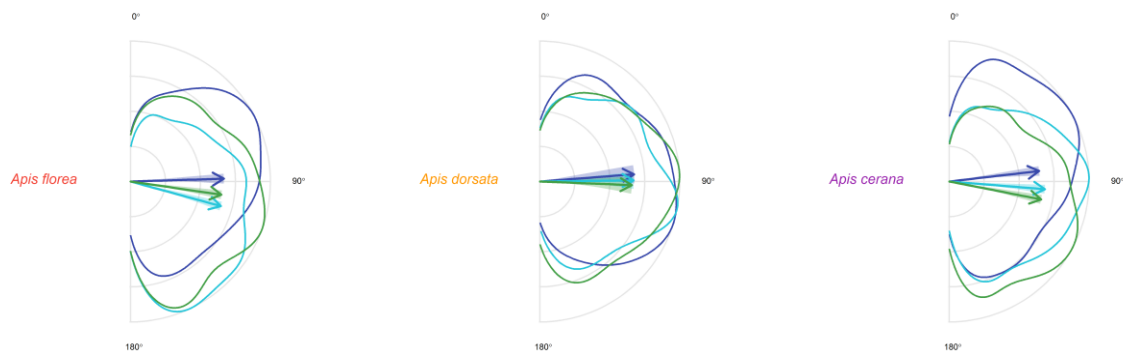

288

289 Relative circular density plots of the constrained dance follower angles for each of the  
290 different waggle run phase for *A. florea*, *A. dorsata* and *A. cerana*. The relative circular  
291 density is obtained by normalising the density in each bin of 5° to the highest density value,  
292 such that it lies between 0 and 1. The arrows in the plot represent the mean of the constrained  
293 circular distribution with the shaded region around the arrow representing the 95%  
294 confidence interval. The length of the arrow corresponds to the mean resultant length of the  
295 distribution ( $\rho$ ). The lines representing the density plot as well as the arrows are coloured  
296 based on the waggle run phase (Start – blue, Middle – cyan, End – green).

297

298 **Discussion**

299 The results of our study demonstrate that dance followers in three Asian honey bee species,  
300 *A. florea*, *A. dorsata* and *A. cerana* behave similarly throughout the waggle run. At the start  
301 of the run, most followers positioned themselves laterally to the dancer. Then, in the middle  
302 and the end of the run, the number of followers in the lateral and posterior positions around  
303 the dancer was similar. Further, in all three species, the mean orientation of the dance  
304 follower was close to 90° throughout the waggle run. The species differed in the number of  
305 followers per run. Dances by *A. florea* and *A. dorsata* foragers attracted larger number of  
306 followers than those by *A. cerana* foragers. The distance of the food source, and hence the  
307 duration of the waggle phase had no effect on the average number of followers present per  
308 waggle run in all 3 species.

309 The waggle run is hypothesized to represent a ritualization of the initiation of flight towards  
310 the food source [34–36,39]. In the open nesting and phylogenetically ancestral honey bee *A.*  
311 *florea*, dances are indeed oriented in direction of the food source and there is no transposition  
312 of the direction information to a vertical plane, unlike in the giant and cavity nesting honey  
313 bees [40]. With respect to these two traits, one would predict that there should be strong  
314 differences in the dance follower behaviour between *A. florea* and the other species.

315 Specifically, dance followers should align themselves behind the dancers as this would allow  
316 them to most easily obtain the direction of the food source. However, in contrast to these two  
317 predictions *A. florea* dance followers neither aligned themselves behind the dancer nor  
318 showed any other major differences in their behavior in comparison with followers in the  
319 other species'. This finding supports the idea of an evolutionarily conserved mechanism of  
320 spatial information transfer in the dance behavior in all honey bees species [for *A. mellifera*,  
321 see 29].

322 Regarding the question of which sensory signals the dance followers use to obtain the spatial  
323 information of the dance, our results provide two arguments for the “tactile hypothesis”. The  
324 first is the higher number of followers in the lateral positions around the dancer throughout  
325 the run, which is similar to the pattern observed in *A. mellifera* [25,29,59]. The second line of  
326 evidence comes from the median body angle of the dance followers, which was close to 90°  
327 throughout the waggle run for all 3 species. Thus, followers preferred arranging themselves  
328 perpendicular to the dancer, likely using the same signals associated with this position, to  
329 obtain the spatial information in all 3 species.

330 Regarding the “follow hypothesis”, the pattern of the number of followers in the posterior  
331 position seen in our study provides an argument against it. The number of followers in the  
332 posterior position at the start of the run was not significantly different from the number of  
333 followers in the anterior position and was lower than the number of followers in the lateral  
334 position. Since the entire run encodes spatial information, the number of followers in the  
335 posterior position should have been high throughout the dance if following from this position  
336 was important for the information transfer. Similar to previous studies, the number of  
337 followers in the posterior position increased as the run progressed [29,60], certainly a direct  
338 consequence of the dancers forward movement during the run [29,59]. As the dancer moves  
339 forward, followers are shifted from the lateral to the posterior position. However, there was  
340 no decrease in the number of followers in the lateral position in the middle and the end of the  
341 waggle run in our observations. This suggests that either some of the followers can actively  
342 maintain their lateral positions or that vacated positions to the lateral side of the dancer are  
343 immediately occupied. Both possibilities would support the idea that the lateral position is  
344 more important than the posterior.

345 If the “tactile hypothesis” is correct, tactile cues associated with the lateral position around  
346 the dancer are the mechanism by which spatial information is transferred during the waggle

347 dance. Dance followers who are laterally positioned experience a regular pattern of antennal  
348 deflections which correlate strongly with the number of abdomen waggles [29,60,61]. Since  
349 the frequency of wagging of the abdomen is likely to be similar amongst bees of the same  
350 species due to physical constraints [62], followers can use this to estimate the duration of the  
351 waggle phase. At the same time, the dance followers can obtain the orientation of the waggle  
352 run by using their own body position with respect to gravity as a reference. The Johnston's  
353 organ may play a major role in sensing information about the direction of the waggle phase  
354 and hence the direction of the food source [63,64]. The similarity in dance follower behaviour  
355 across four species of the genus *Apis* [this study, 29] suggests that the mechanism of spatial  
356 information transfer in the waggle dance is likely through these tactile cues.

357 To further substantiate the "tactile hypothesis", detailed high-speed video recordings of the  
358 antennal contacts between the dancers and the followers in all 3 species during the waggle  
359 run would be needed. In addition, the follower's flight patterns after exiting the hive should  
360 also be observed to identify whether the information is transmitted. Even though our study  
361 provides strong support for the tactile hypothesis, we cannot completely rule out the  
362 possibility that followers can also obtain relevant information from orienting themselves  
363 behind the dancer [65]. Recent studies which have focused on the information transfer during  
364 the dance show that the transfer does not depend on the follower position around the dancer  
365 [33,65,66]. However, these studies only quantified the number of followers in the various  
366 zones around the dancer and did not compare the mean body orientation of the followers  
367 while following the dance. Combining detailed observations of the follower behaviour using  
368 a high-speed camera with tracking of their foraging trips [28] is essential to gain a better  
369 understanding of the mechanism underlying spatial information transfer in the waggle dance  
370 and confirm the tactile hypothesis.

371 Differences in other signals associated with the waggle dance in the various *Apis* species is  
372 linked to the modality best suited to attract followers to the dancer according to the nest  
373 environment of the species (fig 4). In our study, the two open nesting species, *A. florea* and *A.*  
374 *dorsata*, had higher numbers of dance followers throughout the waggle run as compared to  
375 the cavity nesting *A. cerana*. Additionally, the median body orientation did not change  
376 significantly throughout the run in the case of *A. dorsata*, while it increased from the start to  
377 the end of the run in both *A. florea* and *A. cerana*. Dancers in *A. dorsata* produce both a  
378 visual and an acoustic signal, while dancers in *A. florea* and *A. cerana* are known to use only  
379 one additional signal modality, visual and acoustic respectively [36,40,67]. Further work will

380 be needed to tease out the exact modulatory effect of the additional signals in the waggle  
381 dance in these species.

382 **Figure 4**

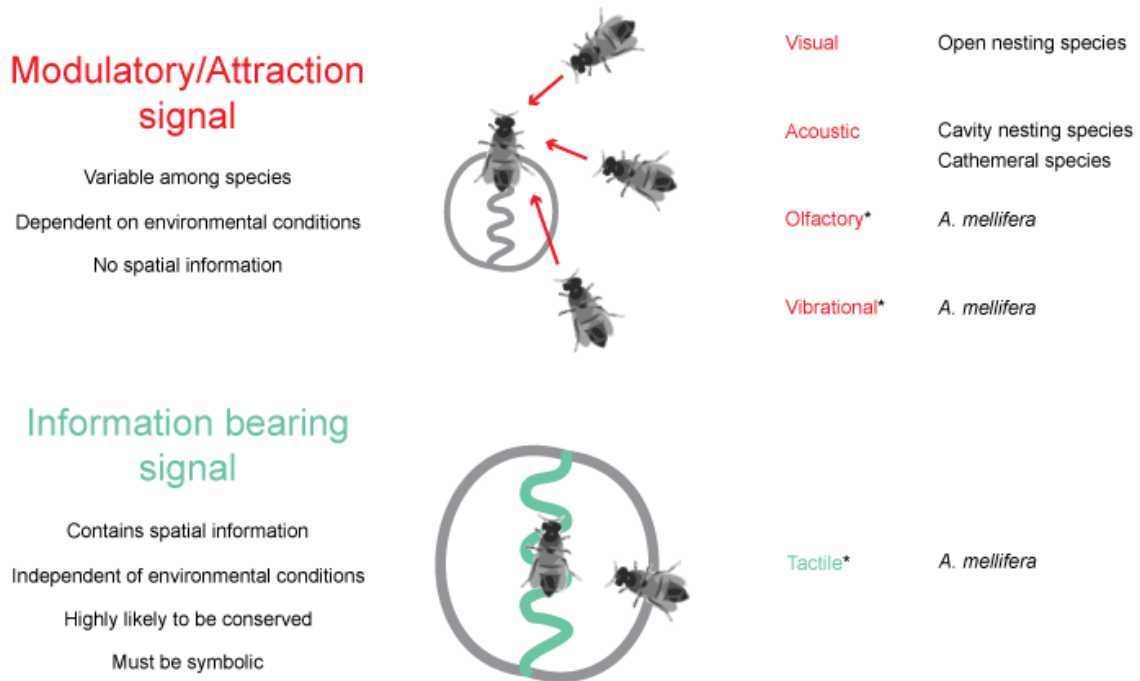

383

384 Signals produced by the dancer in different honey bee species. Signals can either attract  
385 followers to the dancer or contain information. While the former is expected to be different  
386 amongst species depending on nesting and foraging conditions, the latter should be highly  
387 conserved amongst the species. Signals with an asterisk (\*) next to them have only been  
388 studied in *A. mellifera* so far. Visual and acoustic signals are only present in some species,  
389 olfactory signals cannot contain any spatial information and vibrational signals are not  
390 expected to play a role in the open nesting species as the dances often happen over other bees  
391 [34]. Tactile signals are the most likely to contain spatial information about the food source in  
392 the genus *Apis*.

393

394 In conclusion, the behavioural responses of the followers to the differing dance signals in  
395 Asian honey bees provides new insights into the evolution of this complex communication  
396 system. The difficulty in incorporating a mechanism for the transfer of spatial information  
397 into any communication system is evident from the fact that such a mechanism has evolved  
398 only rarely in animals [12]. The symbolic communication of navigational information in *Apis*  
399 likely evolved on the basis of a less complicated and non-error prone modulatory  
400 communication as seen in the closely related stingless bees and bumblebees [34–36,68].  
401 Given the difficulty in evolving such a symbolic communication system, it can be expected  
402 that there will be very little variation in the mechanism for information transfer within a small

403 group of closely related species. In line with this, we found that the behaviour of the dance  
404 followers, who receive the spatial information, is highly conserved across the genus.  
405 Additional signals in the waggle dance of the different species may be involved in attracting  
406 followers to the dancer (fig 4). Thus, our study highlights the usefulness of comparative  
407 studies to understand complex communication systems like the honey bee waggle dance and  
408 provides a foundation for future studies exploring the dancer and follower behaviour in the  
409 genus *Apis*.

## 410 **Data Accessibility**

411 All the raw data obtained from these experiments is available online at Figshare  
412 (<https://doi.org/10.6084/m9.figshare.11790342.v1>).

## 413 **Funding**

414 E.A.G. was supported by the NCBS Graduate school. N.T. was supported by ICAR-JRF  
415 (PGS). A.B. was supported by National Centre for Biological Sciences – Tata Institute of  
416 Fundamental Research institutional funds No. 12P4167.

## 417 **Author Contributions**

418 E.A.G. participated in the conception and design of the study, participated in the experiments,  
419 performed the data analysis and drafted the manuscript. S. P. participated in the video and  
420 data analysis and critically revised the manuscript. N. T. participated in the experiments and  
421 the video analysis and critically revised the manuscript. A. B. participated in the conception  
422 and design of the study, coordinated the study and helped draft the manuscript.

## 423 **Acknowledgments**

424 We are thankful to Patrick Kohl for spearheading the project on dance dialects in Asian  
425 honey bees, the videos of which we have used in this analysis and for comments on this draft  
426 of the manuscript. We are also thankful to Patrick and Benjamin Rutschmann for providing  
427 us with video recordings of dancing foragers in *A. dorsata*.

## 428 **References**

429 1. Searcy WA, Nowicki S. 2005 *The Evolution of Animal Communication*. New Jersey, U.S.A:  
430 Princeton University Press. See



- 431 [https://press.princeton.edu/books/paperback/9780691070957/the-evolution-of-animal-](https://press.princeton.edu/books/paperback/9780691070957/the-evolution-of-animal-communication)  
432 [communication.](https://press.princeton.edu/books/paperback/9780691070957/the-evolution-of-animal-communication)
- 433 2. Conradt L, Roper TJ. 2003 Group decision-making in animals. *Nature* **421**, 155–158.  
434 (doi:10.1038/nature01294)
- 435 3. Chittka L, Leadbeater E. 2005 Social learning: Public information in insects. *Curr. Biol.* **15**, 869–  
436 871. (doi:10.1016/j.cub.2005.10.018)
- 437 4. Freeberg TM, Dunbar RIM, Ord TJ. 2012 Social complexity as a proximate and ultimate factor in  
438 communicative complexity. *Philos. Trans. R. Soc. B Biol. Sci.* **367**, 1785–1801.  
439 (doi:10.1098/rstb.2011.0213)
- 440 5. Ord TJ, Garcia-Porta J. 2012 Is sociality required for the evolution of communicative complexity?  
441 Evidence weighed against alternative hypotheses in diverse taxonomic groups. *Philos. Trans. R.*  
442 *Soc. B Biol. Sci.* **367**, 1811–1828. (doi:10.1098/rstb.2011.0215)
- 443 6. Czaczkes TJ, Grüter C, Ratnieks FLW. 2015 Trail Pheromones: An Integrative View of Their Role in  
444 Social Insect Colony Organization. *Annu. Rev. Entomol.* **60**, 581–599. (doi:10.1146/annurev-ento-  
445 010814-020627)
- 446 7. Mitoyen C, Quigley C, Fusani L. 2019 Evolution and function of multimodal courtship displays.  
447 *Ethology* **125**, 503–515. (doi:10.1111/eth.12882)
- 448 8. Hölldobler B. 1999 Multimodal signals in ant communication. *J. Comp. Physiol. A* **184**, 129–141.  
449 (doi:10.1007/s003590050313)
- 450 9. Andersson M. 1994 *Sexual Selection*. New Jersey, U.S.A: Princeton University Press. See  
451 [https://press.princeton.edu/books/paperback/9780691000572/sexual-selection.](https://press.princeton.edu/books/paperback/9780691000572/sexual-selection)
- 452 10. Ligon RA, Diaz CD, Morano JL, Troscianko J, Stevens M, Moskeland A, Laman TG, Iii ES. 2018  
453 Evolution of correlated complexity in the radically different courtship signals of birds-of-  
454 paradise. *PLOS Biol.* **16**, e2006962. (doi:10.1371/journal.pbio.2006962)
- 455 11. Ord TJ, Stamps JA, Losos JB. 2010 Adaptation and Plasticity of Animal Communication in  
456 Fluctuating Environments. *Evolution* **64**, 3134–3148. (doi:10.1111/j.1558-5646.2010.01056.x)
- 457 12. von Frisch K. 1967 *The dance language and orientation of bees*. Harvard University Press.
- 458 13. Jarau Stefan, Hrncir Michael. 2009 *Food Exploitation by Social Insects : Ecological, Behavioral,*  
459 *and Theoretical Approaches*. Taylor & Francis.
- 460 14. Seeley TD. 1995 *The Wisdom of the Hive*.
- 461 15. Seeley TD, Mikheyev AS, Pagano GJ. 2000 Dancing bees tune both duration and rate of waggle-  
462 run production in relation to nectar-source profitability. *J. Comp. Physiol. - Sens. Neural Behav.*  
463 *Physiol.* **186**, 813–819. (doi:10.1007/s003590000134)
- 464 16. Gardner KE, Seeley TD, Calderone NW. 2008 Do honeybees have two discrete dances to  
465 advertise food sources? *Anim. Behav.* **75**, 1291–1300. (doi:10.1016/j.anbehav.2007.09.032)

- 466 17. De Marco RJ, Farina WM. 2001 Changes in food source profitability affect the trophallactic and  
467 dance behavior of forager honeybees (*Apis mellifera* L.). *Behav. Ecol. Sociobiol.* **50**, 441–449.  
468 (doi:10.1007/s002650100382)
- 469 18. Seeley TD. 1989 Social foraging in honey bees: how nectar foragers assess their colony's  
470 nutritional status. *Behav. Ecol. Sociobiol.* **24**, 181–199. (doi:10.1007/BF00292101)
- 471 19. George EA, Brockmann A. 2019 Social modulation of individual differences in dance  
472 communication in honey bees. *Behav. Ecol. Sociobiol.* **73**, 41. (doi:10.1007/s00265-019-2649-0)
- 473 20. Farina WM, Núñez JA. 1991 Trophallaxis in the honeybee, *Apis mellifera* (L.) as related to the  
474 profitability of food sources. *Anim. Behav.* **42**, 389–394. (doi:10.1016/S0003-3472(05)80037-5)
- 475 21. De Marco RJ. 2006 How bees tune their dancing according to their colony's nectar influx: re-  
476 examining the role of the food-receivers' 'eagerness'. *J. Exp. Biol.* **209**, 421–432.  
477 (doi:10.1242/jeb.02025)
- 478 22. Tan K, Dong S, Li X, Liu X, Wang C, Li J, Nieh JC. 2016 Honey Bee Inhibitory Signaling Is Tuned to  
479 Threat Severity and Can Act as a Colony Alarm Signal. *PLOS Biol.* **14**, e1002423.  
480 (doi:10.1371/journal.pbio.1002423)
- 481 23. Thom C. 2003 The tremble dance of honey bees can be caused by hive-external foraging  
482 experience. *J. Exp. Biol.* **206**, 2111–2116. (doi:10.1242/jeb.00398)
- 483 24. Seeley TD, Towne WF. 1992 Tactics of dance choice in honey bees: do foragers compare dances?  
484 *Behav. Ecol. Sociobiol.* **30**, 59–69. (doi:10.1007/BF00168595)
- 485 25. Landgraf T, Bierbach D, Kirbach A, Cusing R, Oertel M, Mar RO. 2018 Dancing Honey bee Robot  
486 Elicits Dance-Following and Recruits Foragers. *ArXiv* , 1–25.
- 487 26. Michelsen A, Andersen B. 1992 How honeybees perceive communication dances, studied by  
488 means of a mechanical model. *Behav. Ecol. Sociobiol.* **30**, 143–150.
- 489 27. Chatterjee A, George EA, Prabhudev MV, Basu P, Brockmann A. 2019 Honey bees flexibly use  
490 two navigational memories when updating dance distance information. *J. Exp. Biol.* , jeb.195099.  
491 (doi:10.1242/jeb.195099)
- 492 28. Menzel R *et al.* 2011 A Common Frame of Reference for Learned and Communicated Vectors in  
493 Honeybee Navigation. *Curr. Biol.* **21**, 645–650. (doi:10.1016/j.cub.2011.02.039)
- 494 29. Gil M, De Marco RJ. 2010 Decoding information in the honeybee dance: Revisiting the tactile  
495 hypothesis. *Anim. Behav.* **80**, 887–894. (doi:10.1016/j.anbehav.2010.08.012)
- 496 30. Božič J, Valentinčič T. 1991 Attendants and followers of honey bee waggle dances. *J. Apic. Res.*  
497 **30**, 125–131. (doi:10.1080/00218839.1991.11101246)
- 498 31. Michelsen A. 2003 Signals and flexibility in the dance communication of honeybees. *J. Comp.*  
499 *Physiol. A* **189**, 165–174. (doi:10.1007/s00359-003-0398-y)
- 500 32. Michelsen A, Kirchner WH, Lindauer M. 1986 Sound and vibrational signals in the dance  
501 language of the honeybee, *Apis mellifera*. *Behav. Ecol. Sociobiol.* , 207–212.

- 502 33. Judd TM. 1994 The waggle dance of the honey bee: which bees following a dancer successfully  
503 acquire the information? *J. Insect Behav.* **8**, 343–354. (doi:10.1007/BF01989363)
- 504 34. Dyer FC. 2002 The biology of the dance language. *Annu. Rev. Entomol.* **47**, 917–949.  
505 (doi:10.1146/annurev.ento.47.091201.145306)
- 506 35. Barron AB, Plath JA. 2017 The evolution of honey bee dance communication: a mechanistic  
507 perspective. *J. Exp. Biol.* **220**, 4339–4346. (doi:10.1242/jeb.142778)
- 508 36. l'Anson Price R, Grüter C. 2015 Why, when and where did honey bee dance communication  
509 evolve? *Front. Ecol. Evol.* **3**, 1–7. (doi:10.3389/fevo.2015.00125)
- 510 37. Tautz J, Casas J, Sandeman D. 2001 Phase reversal of vibratory signals in honeycomb may assist  
511 dancing honeybees to attract their audience. *J. Exp. Biol.* **204**, 3737–3746.
- 512 38. Towne WF. 1985 Acoustic and visual cues in the dances of four honey bee species. *Behav. Ecol.*  
513 *Sociobiol.* **16**, 185–187. (doi:10.1007/BF00295154)
- 514 39. Lindauer M. 1956 Über die verständigung bei indischen bienen. *Z. Für Vgl. Physiol.* **38**, 521–557.  
515 (doi:10.1007/BF00341108)
- 516 40. Dyer FC. 1985 Mechanisms of dance orientation in the Asian honey bee *Apis florea* L. *J. Comp.*  
517 *Physiol. A* , 183–198.
- 518 41. Kirchner WH, Dreller C, Grasser A, Baidya D. 1996 The silent dances of the Himalayan honeybee,  
519 *Apis laboriosa*. *Apidologie* **27**, 331–339. (doi:10.1051/apido:19960501)
- 520 42. Kirchner WH, Dreller C. 1993 Acoustical Signals in the Dance Language of the Giant Honeybee ,  
521 *Apis dorsata*. *Behav. Ecol. Sociobiol.* **33**, 67–72.
- 522 43. Dyer FC, Seeley TD. 1991 Dance Dialects and Foraging Range in 3 Asian Honey-Bee Species.  
523 *Behav. Ecol. Sociobiol.* **28**, 227–233. (doi:10.1007/BF00175094)
- 524 44. Sen Sarma M, Esch HE, Tautz J. 2004 A comparison of the dance language in *Apis mellifera*  
525 *carnica* and *Apis florea* reveals striking similarities. *J. Comp. Physiol. A* **190**, 49–53.  
526 (doi:10.1007/s00359-003-0470-7)
- 527 45. Kohl PL, Thulasi N, Rutschmann B, George EA, Steffan-Dewenter I, Brockmann A. 2020 (In Press)  
528 Adaptive evolution of honeybee dance dialects. *Proc. R. Soc. B* , 20200190.  
529 (doi:10.1098/rspb.2020.0190)
- 530 46. Johnson NL, Kemp AW, Kotz S. 2005 *Univariate Discrete Distributions*. Third. Hoboken, NJ, USA:  
531 John Wiley & Sons, Inc. (doi:10.1002/0471715816)
- 532 47. Wagenmakers E-J, Farrell S. 2004 AIC model selection using Akaike weights. *Psychon. Bull. Rev.*  
533 **11**, 192–196. (doi:10.3758/BF03206482)
- 534 48. Watson GS, Williams EJ. 1956 On the Construction of Significance Tests on the Circle and the  
535 Sphere. *Biometrika* **43**, 344. (doi:10.2307/2332913)
- 536 49. Pewsey A. 2002 Testing circular symmetry. *Can. J. Stat.* **30**, 591–600. (doi:10.2307/3316098)

- 537 50. Fisher NI. 1993 *Statistical Analysis of Circular Data*. Cambridge: Cambridge University Press.  
538 (doi:10.1017/CBO9780511564345)
- 539 51. Pewsey Arthur, Neuhäuser Markus, Ruxton GD. 2013 *Circular Statistics in R*. Oxford University  
540 Press.
- 541 52. R Core Team. 2018 R: A Language and Environment for Statistical Computing.
- 542 53. RStudio Team. 2016 RStudio: Integrated Development Environment for R.
- 543 54. Brooks M E, Kristensen K, Benthem K J ,van, Magnusson A, Berg C W, Nielsen A, Skaug H J,  
544 Mächler M, Bolker B M. 2017 glmmTMB Balances Speed and Flexibility Among Packages for  
545 Zero-inflated Generalized Linear Mixed Modeling. *R J.* **9**, 378. (doi:10.32614/RJ-2017-066)
- 546 55. Barton K. 2017 MuMIn: Multi-Model Inference.
- 547 56. Hartig F. 2018 DHARMA: Residual Diagnostics for Hierarchical (Multi-Level / Mixed) Regression  
548 Models.
- 549 57. Lenth R. 2019 emmeans: Estimated Marginal Means, aka Least-Squares Means.
- 550 58. Agostinelli C, Lund U. 2017 R package 'circular' : Circular Statistics (version 0.4-93).
- 551 59. Lam C, Li Y, Landgraf T, Nieh J. 2017 Dancing attraction: followers of honey bee tremble and  
552 waggle dances exhibit similar behaviors. *Biol. Open* **6**, 810–817. (doi:10.1242/bio.025445)
- 553 60. Rohrseitz K, Tautz J. 1999 Honey bee dance communication: waggle run direction coded in  
554 antennal contacts? *J. Comp. Physiol. [A]* **184**, 463–470. (doi:10.1007/s003590050346)
- 555 61. Michelsen A. 2012 How Do Honey Bees Obtain Information About Direction by Following  
556 Dances? In *Honeybee Neurobiology and Behavior*, pp. 65–76. Dordrecht: Springer Netherlands.  
557 (doi:10.1007/978-94-007-2099-2\_6)
- 558 62. Hrncir M, Maia-Silva C, Mc Cabe SI, Farina WM. 2011 The recruiter's excitement - features of  
559 thoracic vibrations during the honey bee's waggle dance related to food source profitability. *J.*  
560 *Exp. Biol.* **214**, 4055–4064. (doi:10.1242/jeb.063149)
- 561 63. Ai H, Okada R, Sakura M, Wachtler T, Ikeno H. 2019 Neuroethology of the Waggle Dance: How  
562 Followers Interact with the Waggle Dancer and Detect Spatial Information. *Insects* **10**, 336.  
563 (doi:10.3390/insects10100336)
- 564 64. Brockmann A, Robinson GE. 2007 Central projections of sensory systems involved in honey bee  
565 dance language communication. *Brain. Behav. Evol.* **70**, 125–36. (doi:10.1159/000102974)
- 566 65. Tanner D, Visscher K. 2008 Does the body orientation of waggle dance followers affect the  
567 accuracy of recruitment? *Apidologie* **40**, 55–62. (doi:10.1051/apido:2008074)
- 568 66. Kietzman PM, Visscher PK. 2019 Follower Position Does Not Affect Waggle Dance Information  
569 Transfer. *Psyche N. Y.* **2019**, 8–13. (doi:10.1155/2019/4939120)
- 570 67. Beekman M, Makinson JC, Couvillon MJ, Preece K, Schaerf TM. 2015 Honeybee linguistics - a  
571 comparative analysis of the waggle dance among species of Apis. *Front. Ecol. Evol.* **3**, 1–11.  
572 (doi:10.3389/fevo.2015.00011)

573 68. Dornhaus A, Chittka L. 2001 Food alert in bumblebees (*Bombus terrestris*): possible mechanisms  
574 and evolutionary implications. *Behav. Ecol. Sociobiol.* **50**, 570–576.

575
